# Supplementary material for: Redefining the Role of ADAM17 in Renal Proximal Tubular Cells and Its Implications in an Obese Mouse Model of Pre-Diabetes
Source: MDPI journal article supplement (doi:10.3390/ijms222313093), 2021-12-03
Supplement: s1 [file s1]

Supplementary Figure S1

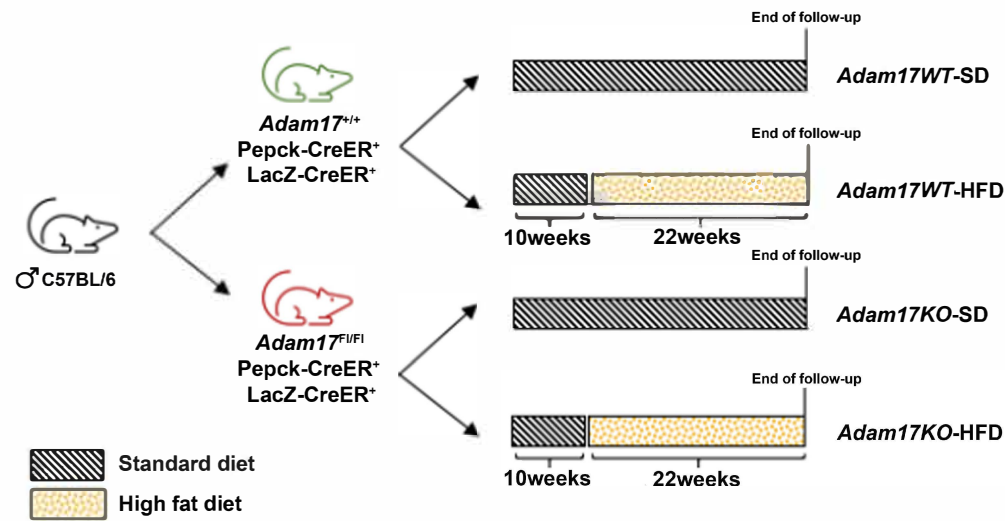

**Supplementary Table S1. Primer sequences used for Real Time qPCR analysis**

|                                | <b>FORWARD</b>                        | <b>REVERSE</b>                        |
|--------------------------------|---------------------------------------|---------------------------------------|
| <b>Tnf-<math>\alpha</math></b> | 5'-GAC TAG CCA GGA GGG AGA ACA G-3'   | 5'-CAG TGA GTG AAA GGG ACA GAA CCT-3' |
| <b>Col IV</b>                  | 5'-TGT CCA TGG CAC CCA TCT CT-3'      | 5'-CAC AAA CCG CAC ACC TGC TA-3'      |
| <b>NOX4</b>                    | 5'- CTT GGT GAA TGC CCT CAA CT-3'     | 5'-TTC TGG GAT CCT CAT TCT GG-3'      |
| <b>GAPDH</b>                   | 5'-TCA TTG ACC TCA ACT ACA TGG TCT-3' | 5'-CTT GAC TGT GCC GTT GAA TTT-3'     |
